# Supplementary material for: Effective photocatalytic degradation of rhodamine-B over Zn-doped BaO 2 and SrO 2 composites under UV and sunlight irradiation
Source: Royal Society of Chemistry journal article supplement (doi:10.1039/d3su00091e), 2023-01-01
Supplement: d3su00091e1.pdf [file d3su00091e1.pdf]

## Supporting Information

# Effective photocatalytic degradation of Rhodamine-B over Zn-doped BaO<sub>2</sub> and SrO<sub>2</sub> composites under UV and Sunlight Irradiation

Kirankumar Venkatesan Savunthari,<sup>a,b,c</sup> Daneshwaran Balaji<sup>a</sup>, Nivedita Sudheer,<sup>a</sup> Mittal Bathwar,<sup>a</sup> Manjunath Rangasamy,<sup>b</sup> Ganesh Kumar Dhandabani,<sup>d</sup> Alain R. Puente Santiago,<sup>e</sup> Sumathi Shanmugam,<sup>a\*</sup> Kien-Voon Kong,<sup>b\*</sup> and Vijayaraghavan Rajagopalan<sup>a\*</sup>

<sup>a</sup>*Department of Chemistry, School of Advanced Sciences, Vellore Institute of Technology, Vellore, Tamil Nadu 632014, India.*

<sup>b</sup>*Department of Chemistry, National Taiwan University, Taipei 106, Taiwan.*

<sup>c</sup>*Department of Chemistry and Chemical Biology, Northeastern University, Boston, Massachusetts 02115, United States.*

<sup>d</sup>*Department of Pharmacy, National Taiwan University, Taipei 100, Taiwan.*

<sup>e</sup>*Walker Department of Mechanical Engineering, University of Texas at Austin, Austin, Texas 78712, United States.*

### Corresponding Authors

ssumathi@vit.ac.in (S.Sumathi); kvkong@ntu.edu.tw (K.V. Kong); rvijayaraghavan@vit.ac.in (R. Vijayaraghavan)

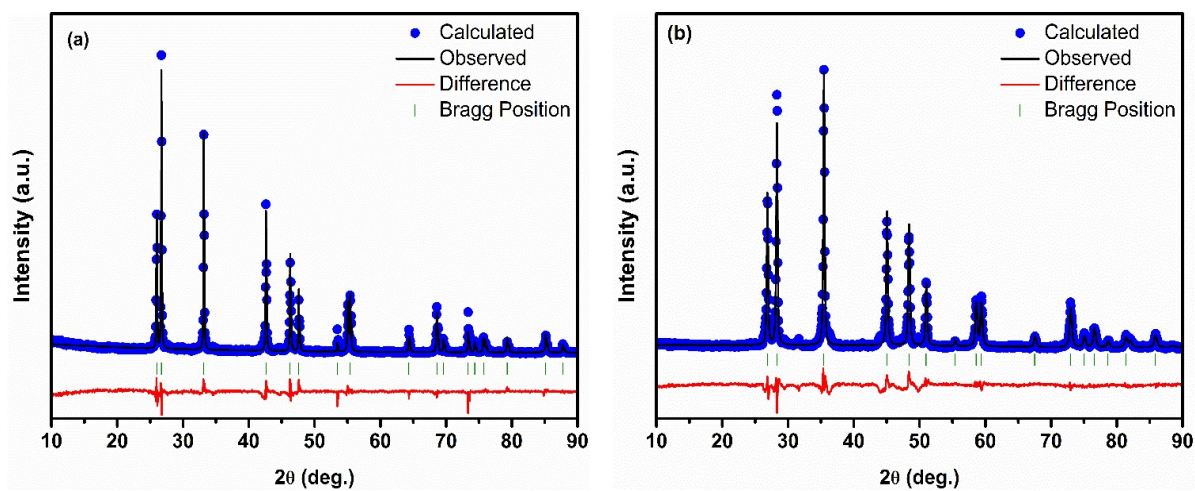

**Fig. S1.** Rietveld refinement results of (a) BaO<sub>2</sub> and (b) SrO<sub>2</sub> nanoparticles.

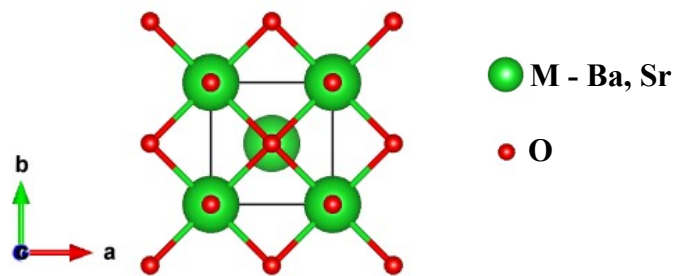

**Fig. S2.** Crystal structure of BaO<sub>2</sub> and SrO<sub>2</sub> nanoparticles.

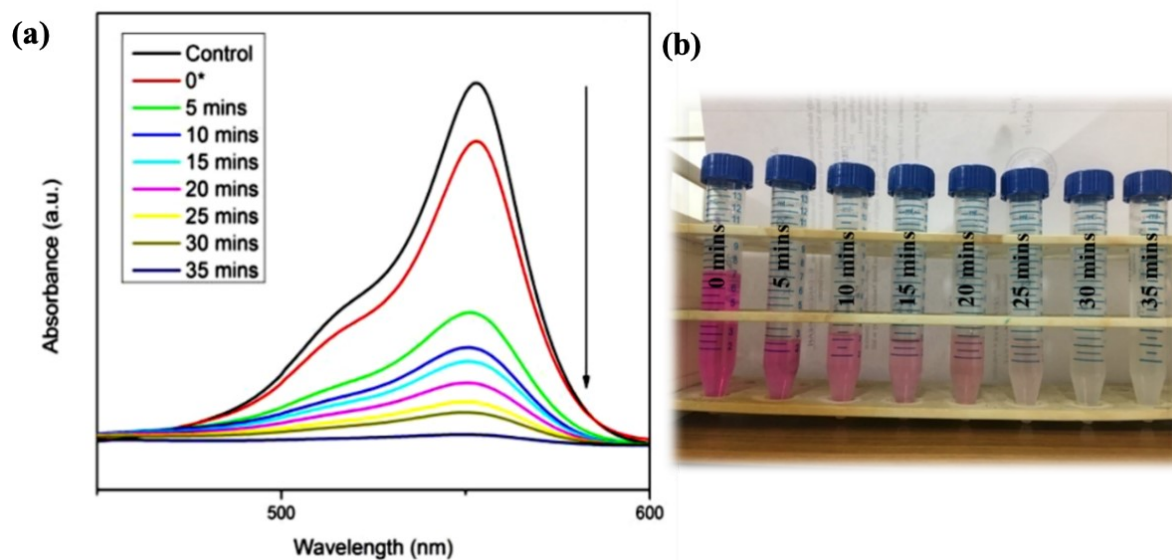

**Fig. S3.** (a) photocatalytic degradation of RhB and (b) photographs of RhB photodegradation at different times using BaO<sub>2</sub> photocatalysts under UV-light irradiation.

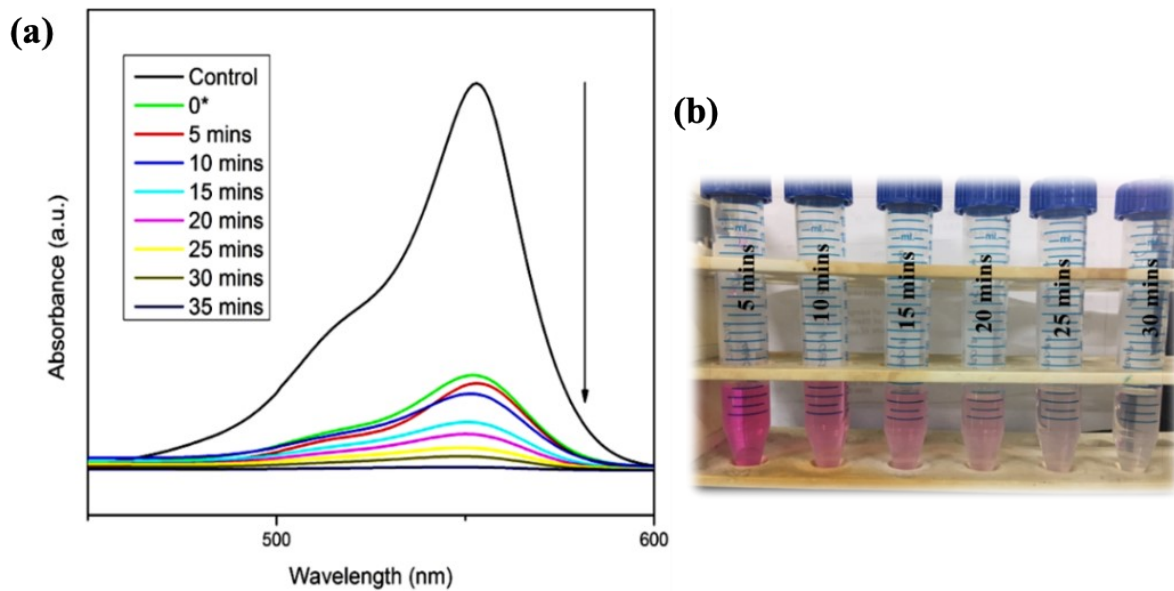

**Fig. S4.** (a) photocatalytic degradation of RhB and (b) photographs of RhB photodegradation at different times using  $\text{SrO}_2$  photocatalysts under UV-light irradiation.

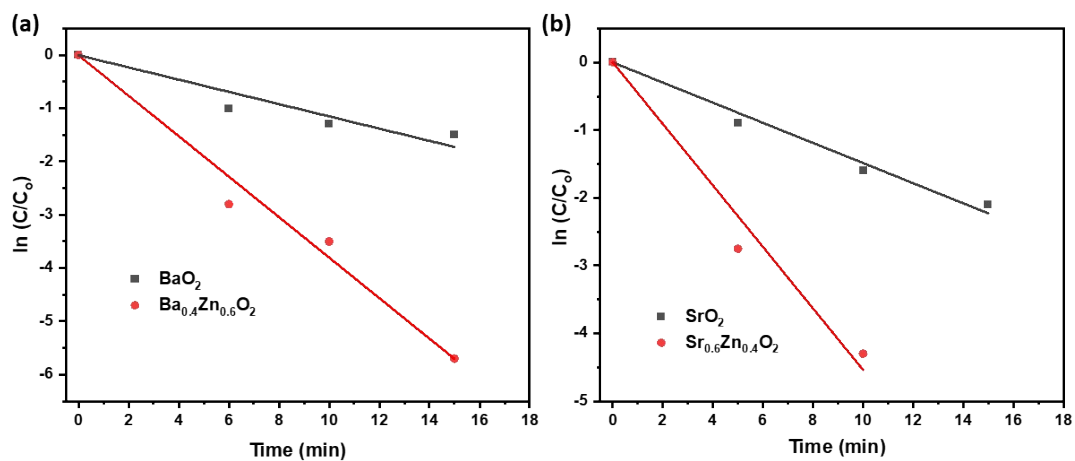

**Fig. S5.** First-order kinetic plots of RhB photodegradation using (a)  $\text{BaO}_2$  and  $\text{Ba}_{0.4}\text{Zn}_{0.6}\text{O}_2$  (b)  $\text{SrO}_2$  and  $\text{Sr}_{0.6}\text{Zn}_{0.4}\text{O}_2$  photocatalysts under UV-light illumination.

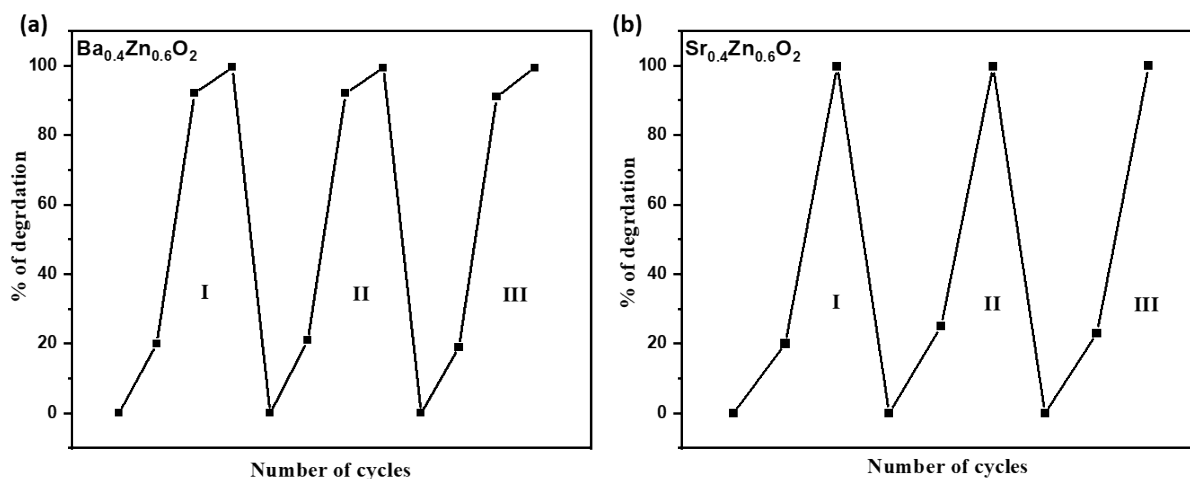

**Fig. S6.** Reusability of  $\text{Ba}_{0.4}\text{Zn}_{0.6}\text{O}_2$  (a) and  $\text{Sr}_{0.6}\text{Zn}_{0.4}\text{O}_2$  (b) for dye degradation under UV irradiation

**Table S1.** Rietveld refinement results for BaO<sub>2</sub> and SrO<sub>2</sub>

| Chemical formula                                      |                | BaO <sub>2</sub>   |                  | SrO <sub>2</sub>   |                  |                 |                  |
|-------------------------------------------------------|----------------|--------------------|------------------|--------------------|------------------|-----------------|------------------|
| Crystal system                                        |                | Tetragonal         |                  | Tetragonal         |                  |                 |                  |
| Space group                                           |                | I4/mmm             |                  | I4/mmm             |                  |                 |                  |
| a, Å                                                  |                | 3.81(4)            |                  | 3.57(3)            |                  |                 |                  |
| c, Å                                                  |                | 6.85(2)            |                  | 6.62(4)            |                  |                 |                  |
| V, Å <sup>3</sup>                                     |                | 99.82(4)           |                  | 84.82(2)           |                  |                 |                  |
| Z                                                     |                | 2                  |                  | 2                  |                  |                 |                  |
| Radiation                                             |                | Cu Kα <sub>1</sub> |                  | Cu Kα <sub>1</sub> |                  |                 |                  |
| Wavelength, Å                                         |                | 1.5406             |                  | 1.5406             |                  |                 |                  |
| 2θ range, °                                           |                | 10-90              |                  | 10-70              |                  |                 |                  |
| R <sub>wp</sub> , %                                   |                | 15.31              |                  | 12.61              |                  |                 |                  |
| R <sub>bragg</sub> , %                                |                | 11.83              |                  | 9.62               |                  |                 |                  |
| Compositi<br>on                                       | χ <sup>2</sup> | Ba (wt%)           |                  | Sr (wt%)           |                  | Zn (wt%)        |                  |
|                                                       |                | Theoreti<br>cal    | Experime<br>ntal | Theoreti<br>cal    | Experime<br>ntal | Theoreti<br>cal | Experime<br>ntal |
| Ba <sub>0.4</sub> Zn <sub>0.6</sub><br>O <sub>2</sub> |                | 43.5               | 43.2             |                    |                  | 31.1            | 30.8             |
| Sr <sub>0.6</sub> Zn <sub>0.4</sub> O<br>2            |                |                    |                  | 47.5               | 47.2             | 23.6            | 23.2             |

Table S2. Composition by ICP - OES

**Table S3.** Amount of H<sub>2</sub>O<sub>2</sub> released in aqueous suspension

| x   | H <sub>2</sub> O <sub>2</sub> amount (±2 ppm)    |                                                  |
|-----|--------------------------------------------------|--------------------------------------------------|
|     | Ba <sub>1-x</sub> Zn <sub>x</sub> O <sub>2</sub> | Sr <sub>1-x</sub> Zn <sub>x</sub> O <sub>2</sub> |
| 0   | 10                                               | 9                                                |
| 0.2 | 15                                               | 15                                               |
| 0.4 | 19                                               | 28                                               |
| 0.6 | 25                                               | 22                                               |
| 0.8 | 20                                               | 18                                               |

**Table S4** Comparison results of photocatalytic degradation of RhB with different photocatalysts under UV light irradiation (N.S Not studied).

| Compound                                             | Catalyst quantity (mg) | RhB concentration (ppm) | Degradation efficiency (%) | Rate constant k (min <sup>-1</sup> ) | Time (min) | References          |
|------------------------------------------------------|------------------------|-------------------------|----------------------------|--------------------------------------|------------|---------------------|
| Zn <sub>2</sub> SnO <sub>4</sub>                     | 40                     | 5                       | 99.0                       | 0.0124                               | 90         | 1                   |
| Pt/TiO <sub>2</sub>                                  | 100                    | 10                      | 97.5                       | 0.0172                               | 120        | 2                   |
| Pt-TiO <sub>2</sub>                                  | 300                    | 10                      | 63.0                       | 0.0053                               | 180        | 3                   |
| Ag-ZnO                                               | 25                     | 5                       | 99.0                       | N.S                                  | 60         | 4                   |
| CeO <sub>2</sub> -Y <sub>2</sub> O <sub>3</sub>      | 40                     | 10                      | 99.0                       | N.S                                  | 120        | 5                   |
| Zn doped CdS                                         | 20                     | 5                       | 85.0                       | N.S                                  | 135        | 6                   |
| SnO <sub>2</sub> /TiO <sub>2</sub>                   | 100                    | 10                      | 92.0                       | 0.0084                               | 180        | 7                   |
| <b>Ba<sub>0.4</sub>Zn<sub>0.6</sub>O<sub>2</sub></b> | <b>25</b>              | <b>10</b>               | <b>99.90</b>               | <b>0.344</b>                         | <b>15</b>  | <b>Present work</b> |
| <b>Sr<sub>0.6</sub>Zn<sub>0.4</sub>O<sub>2</sub></b> | <b>25</b>              | <b>10</b>               | <b>99.80</b>               | <b>0.394</b>                         | <b>10</b>  | <b>Present work</b> |

**Table S5** Comparison studies of the photodegradation of RhB using various photocatalysts under direct sunlight illumination (N.S: not studied).

| Compound                                                          | Catalyst quantity (mg) | RhB dye (ppm) | Degradation efficiency (%) | Rate constant k (min <sup>-1</sup> ) | Time (min) | References |
|-------------------------------------------------------------------|------------------------|---------------|----------------------------|--------------------------------------|------------|------------|
| MoF                                                               | 20                     | 2             | 96.7                       | N.S                                  | 30         | 8          |
| Zn doped CdS                                                      | 20                     | 5             | 65.0                       | N.S                                  | 135        | 6          |
| S-TiO <sub>2</sub>                                                | 50                     | 10            | 97.0                       | 0.280                                | 120        | 9          |
| Au-ZnO                                                            | 100                    | 10            | 85.0                       | 0.291                                | 90         | 10         |
| BiVO <sub>4</sub>                                                 | 100                    | 5             | 97.0                       | N.S                                  | 600        | 11         |
| RGO/BiVO <sub>4</sub>                                             | 100                    | 5             | 98.50                      | N.S                                  | 600        | 12         |
| AgI/ZnO                                                           | 15                     | 5             | 98.50                      | N.S                                  | 150        | 13         |
| H <sub>3</sub> PW <sub>12</sub> O <sub>40</sub> /TiO <sub>2</sub> | 4.5                    | 12            | 89.80                      | 0.180                                | 240        | 14         |



|                                                      |           |           |              |              |           |                     |
|------------------------------------------------------|-----------|-----------|--------------|--------------|-----------|---------------------|
| MWCNT/WO <sub>3</sub>                                | 50        | 10        | 92.0         | 0.230        | 150       | 15                  |
| <b>Ba<sub>0.4</sub>Zn<sub>0.6</sub>O<sub>2</sub></b> | <b>25</b> | <b>10</b> | <b>99.80</b> | <b>2.480</b> | <b>90</b> | <b>Present work</b> |
| <b>Sr<sub>0.6</sub>Zn<sub>0.4</sub>O<sub>2</sub></b> | <b>25</b> | <b>10</b> | <b>99.50</b> | <b>2.340</b> | <b>90</b> | <b>Present work</b> |

## REFERENCES

- [1] Rovisco, A.; Branquinho, R.; Deuermeier, J.; Freire, T.; Fortunato, E.; Martins, R.; Barquinha, P. Shape Effect of Zinc-Tin Oxide Nanostructures on Photodegradation of Methylene Blue and Rhodamine B under UV and Visible Light. *ACS Appl. Nano Mater.*, **2021**, *4* (2), 1149–1161.
- [2] Mai H.; Abdel-Khalek, M.A.; Ahmed. M.F.; Abdel-Messih, Fathy, E.S. Synthesis of Mesoporous Pt/TiO<sub>2</sub> Nanoparticles by Incipient Wetness Route for Photocatalytic Degradation of Rhodamine B and Methyl Orange Dyes under UV and Sunlight Radiations. *Mater. Sci. Technol.*, DOI: <https://doi.org/10.1016/j.mset.2022.08.001>
- [3] Pol, R.; Guerrero, M.; García-Lecina, E.; Altube, A.; Rossinyol, E.; Garroni, S.; Baró, M. D.; Pons, J.; Sort, J.; Pellicer, E. Ni-, Pt- and (Ni/Pt)-Doped TiO<sub>2</sub> Nanophotocatalysts: A Smart Approach for Sustainable Degradation of Rhodamine B Dye. *Appl. Catal. B: Environ.*, **2016**, *181*, 270–278.
- [4] Rokesh, K.; Mohan, S. C.; Karuppuchamy, S.; Jothivenkatachalam, K. Photo-Assisted Advanced Oxidation Processes for Rhodamine B Degradation Using ZnO-Ag Nanocomposite Materials. *J. Environ. Chem. Eng.*, **2018**, *6* (3), 3610–3620.
- [5] Magdalane, C. M.; Kaviyarasu, K.; Vijaya, J. J.; Siddhardha, B.; Jeyaraj, B.; Kennedy, J.; Maaza, M. Evaluation on the Heterostructured CeO<sub>2</sub>/Y<sub>2</sub>O<sub>3</sub> Binary Metal Oxide Nanocomposites for UV/Vis Light Induced Photocatalytic

- Degradation of Rhodamine - B Dye for Textile Engineering Application. *J. Alloys Compd.*, **2017**, 727, 1324–1337.
- [6] Singh, A.; Singh, D.; Ahmed, B. and Ojha, A.K. Sun/UV-Light Driven Photocatalytic Degradation of Rhodamine B Dye by Zn Doped CdS Nanostructures as Photocatalyst. *Mater. Chem. Phys.*, **2022**, 277, 125531.
- [7] Abdel-Messih, M. F.; Ahmed, M. A.; El-Sayed, A. S. Photocatalytic Decolorization of Rhodamine B Dye Using Novel Mesoporous SnO<sub>2</sub>-TiO<sub>2</sub> Nano Mixed Oxides Prepared by Sol-Gel Method. *J. Photochem. Photobiol.*, **2013**, 260, 1–8.
- [8] Li, X.H.; Liu, Y.; Lin, H.Y.; Xu, N.; Zhang, Z.; Liu, G.C. and Wang. X.L., Solvent-Induced Two Co-Based 3D Metal–Organic Frameworks as Platforms for the High Degradation of Rhodamine B Under Sunlight. *Cryst. Growth Des.*, **2022**, 22, 3845–3852.
- [9] Zhu, M.; Zhai, C.; Qiu, L.; Lu, C.; Paton, A. S.; Du, Y.; Goh, M. C. New Method to Synthesize S-Doped TiO<sub>2</sub> with Stable and Highly Efficient Photocatalytic Performance under Indoor Sunlight Irradiation. *ACS Sustain. Chem. Eng.*, **2015**, 3 (12), 3123–3129.
- [10] Mondal, C.; Pal, J.; Ganguly, M.; Sinha, A. K.; Jana, J.; Pal, T. A One Pot Synthesis of Au-ZnO Nanocomposites for Plasmon-Enhanced Sunlight Driven Photocatalytic Activity. *New J. Chem.*, **2014**, 38 (7), 2999–3005.
- [11] Dong, S.; Feng, J.; Li, Y.; Hu, L.; Liu, M.; Wang, Y.; Pi, Y.; Sun, J.; Sun, J. Shape-Controlled Synthesis of BiVO<sub>4</sub> Hierarchical Structures with Unique Natural-Sunlight-Driven Photocatalytic Activity. *Appl. Catal. B: Environ.*, **2014**, 152-153 (1), 413–424.

- [12] Dong, S.; Cui, Y.; Wang, Y.; Li, Y.; Hu, L.; Sun, J.; Sun, J. Designing Three-Dimensional Acicular Sheaf Shaped BiVO<sub>4</sub>/Reduced Graphene Oxide Composites for Efficient Sunlight-Driven Photocatalytic Degradation of Dye Wastewater. *Chem. Eng. J.*, **2014**, *249*, 102–110.
- [13] Wang, X.; Wan, X.; Xu, X.; Chen, X. Facile Fabrication of Highly Efficient AgI/ZnO Heterojunction and Its Application of Methylene Blue and Rhodamine B Solutions Degradation under Natural Sunlight. *Appl. Surf. Sci.*, **2014**, *321*, 10–18.
- [14] Lu, N.; Zhao, Y.; Liu, H.; Guo, Y.; Yuan, X.; Xu, H.; Peng, H.; Qin, H. Design of Polyoxometallate-Titania Composite Film (H<sub>3</sub>PW<sub>12</sub>O<sub>40</sub>/TiO<sub>2</sub>) for the Degradation of an Aqueous Dye Rhodamine B under the Simulated Sunlight Irradiation. *J. Hazard. Mater.*, **2012**, *199*, 1–8.
- [15] Saleh, T. A.; Gupta, V. K. Functionalization of Tungsten Oxide into MWCNT and Its Application for Sunlight-Induced Degradation of Rhodamine B. *J. Colloid Interface Sci.*, **2011**, *362* (2), 337–344.
